1 **Complexity of ABA signaling for stomatal development and aperture**  
2 **regulation**

3 Pirko Jalakas<sup>1</sup>, Ebe Merilo<sup>1</sup>, Hannes Kollist<sup>1</sup> and Mikael Brosché<sup>1,2</sup>

4 <sup>1</sup> Institute of Technology, University of Tartu, Nooruse 1, 50411 Tartu, Estonia

5 <sup>2</sup> Division of Plant Biology, Viikki Plant Science Centre, Organismal and Evolutionary  
6 Biology Research Programme, Faculty of Biological and Environmental Sciences,  
7 University of Helsinki, P.O. Box 65 (Viikinkaari 1), FI-00014 Helsinki, Finland

8

9 **Abstract**

10 Stomata, small pores on the surfaces of leaves formed by a pair of guard cells, adapt  
11 rapidly to changes in the environment by adjusting the aperture width. As a long term  
12 response, the number of stomata is regulated during stomatal development. The  
13 hormone abscisic acid (ABA) regulates both processes. In ABA mediated guard cell  
14 signaling the protein kinase OPEN STOMATA1 (OST1) has a central role, as  
15 stomatal closure in the *ost1* mutant is impaired in response to ABA and to different  
16 environmental stimuli. We aimed to dissect the contribution of different ABA-related  
17 regulatory mechanisms in determining stomatal conductance, a combination of  
18 stomatal density and aperture width, and crossed the *ost1* mutant with mutants that  
19 either decreased (*aba3*) or increased (*cyp707a1/a3*) the concentration of ABA in  
20 plants. The double mutant *ost1 aba3* had higher stomatal conductance than either  
21 parent due to a combination of increased stomatal aperture width and higher  
22 stomatal density. In the triple mutant *ost1 cyp707a1/a3* stomatal conductance was  
23 significantly lower compared to *ost1-3* due to lower stomatal density. Further  
24 characterization of the single, double and triple mutants showed that responses to  
25 treatments that lead to stomatal closure were impaired in *ost1* as well as *ost1 aba3*  
26 and *ost1 cyp707a1/a3* mutants, supporting a critical role for OST1 in stomatal  
27 aperture regulation. Based on our results, we suggest that there are two signaling  
28 pathways to regulate water flux from leaves i.e. stomatal conductance: an ABA-  
29 dependent pathway that determines stomatal density independent of OST1; and an  
30 OST1-dependent pathway that regulates rapid changes in stomatal aperture.

31

32 **Keywords:** Stomatal density, aperture width, abscisic acid, OST1, signaling  
33 pathways

## 34 Introduction

35 Stomata, formed by a pair of guard cells, are small pores responsible for gas  
36 exchange in leaves. They allow CO<sub>2</sub> uptake for photosynthesis, with the  
37 accompanying loss of water. In addition, air pollutants and some pathogens enter the  
38 plant through stomata. Hence, accurate adjustment of the stomatal pore is required  
39 for the plant to successfully thrive in a changing environment. Not only the width of  
40 the stomatal aperture, but also the number of stomata is regulated by environmental  
41 signals and influences plant gas exchange (Hetherington and Woodward, 2003).  
42 Several studies have shown that doubling of ambient CO<sub>2</sub> concentration leads to a  
43 reduction in stomatal density in different plant species and *Arabidopsis* accessions  
44 (Woodward and Kelly, 1995; Woodward et al., 2002). In contrast, higher light  
45 intensity significantly increases stomatal density (Casson et al., 2009). The main  
46 difference between the adjustment of the stomatal aperture versus the number of  
47 stomata is the scale of time, stomatal aperture can change in minutes, whereas  
48 changes in stomatal density are fixed during leaf development.

49

50 The plant hormone abscisic acid (ABA) plays a central role in the regulation of guard  
51 cell function (Kim et al., 2010; Kollist et al., 2014). ABA-induced stomatal closure is  
52 initiated by binding of the hormone to PYR/RCAR receptors that leads to the  
53 inactivation of type 2C protein phosphatases (PP2Cs), which in turn releases SNF-  
54 related protein kinases (SnRK2s) such as OPEN STOMATA1 (OST1) to activate  
55 guard cell ion channels including SLOW ANION CHANNEL1 (SLAC1). This leads to  
56 the efflux of anions, followed by potassium and water efflux and stomatal closure  
57 (Kim et al., 2010; Kollist et al., 2014).

58

59 As ABA is the central regulatory molecule of stomatal function, fine-tuning of ABA  
60 levels and signaling is of utmost importance during acclimation to abiotic stress, e.g.  
61 drought. Guard cell ABA levels are regulated by de novo biosynthesis, catabolism,  
62 and transport from other plant tissues (Nambara and Marion-Poll, 2005; Merilo et al.,  
63 2015; Merilo et al., 2018). OST1 appears to have a critical role in ABA signaling.  
64 Stomatal closure induced by ABA or environmental factors is strongly impaired in  
65 *ost1* mutants (Mustilli et al., 2002; Merilo et al., 2013). In addition to stomatal  
66 regulation, ABA affects stomatal development, which is also controlled by

67 environmental factors such as light and the level of CO<sub>2</sub> (Casson and Hetherington,  
68 2010; Chater et al., 2015). ABA-deficient mutants have increased stomatal densities  
69 compared to wild-type (Tanaka et al., 2013; Chater et al., 2015), whereas the ABA  
70 over-accumulating *cyp707a1/a3* double mutant had significantly lower stomatal  
71 density than wild-type (Tanaka et al., 2013), supporting the role of ABA in stomatal  
72 development. ABA3 encodes a molybdenum cofactor sulfurase required by an  
73 abscisic aldehyde oxidase to catalyze the conversion of abscisic aldehyde to ABA;  
74 its expression level increases in response to drought and ABA treatment (Xiong et  
75 al., 2001). In non-stressed conditions, the concentration of leaf ABA is approximately  
76 45% of wild-type ABA in *aba3-1* (Merilo et al., 2018). The predominant ABA catabolic  
77 pathway, ABA 8'-hydroxylation, is mediated by four members of the CYP707A gene  
78 family and their transcription levels increase in response to salt and drought stress  
79 as well as ABA (Saito et al., 2004). CYP707A1 and CYP707A3 are important for  
80 post-germination growth, since seedling growth by exogenous ABA was inhibited  
81 more effectively in *cyp707a1* and *cyp707a3* mutants and was more pronounced in  
82 the double mutant that also contained higher concentration of ABA compared to the  
83 single mutants (Okamoto et al., 2006). Both *cyp707a1* and *cyp707a3* loss-of-function  
84 mutants showed reduced stomatal conductance, which was more pronounced in  
85 *cyp707a3* (Merilo et al., 2013).

86

87 Here we report that while OST1 is required in rapid stomatal responses to several  
88 environmental conditions: reduced air humidity, darkness, elevated CO<sub>2</sub>  
89 concentration and exogenous ABA, there are alternative ABA signaling pathways in  
90 guard cells that contribute to stomatal development. These two pathways, OST1-  
91 dependent signaling that regulates stomatal aperture width and OST1-independent  
92 signaling that regulates stomatal density, coordinate the overall water flux through  
93 stomata.

94

95 **Materials and Methods**

96 **Plant material, growth and gas-exchange measurements**

97 Col-0, *aba3-1* and *ost1-3* (*srk2e*, SALK\_008068) were from the European  
 98 Arabidopsis Stock Centre ([www.arabidopsis.info](http://www.arabidopsis.info)). The *cyp707a1 cyp707a3* double  
 99 mutant was a gift from Eiji Nambara (Okamoto et al., 2006). Double mutants and  
 100 other crosses were made through standard techniques and genotyped with PCR-  
 101 based markers.

|                 |                     |                           |                                         |
|-----------------|---------------------|---------------------------|-----------------------------------------|
| <i>aba3-1</i>   | aba3-1-left         | TCATTCTTTCTACTGCTCCTGATTT | dCAPS<br>marker,<br>digest with<br>MnII |
|                 | aba3-1-right        | GGTGAAGCAAATGAACTTATGATG  |                                         |
|                 |                     |                           |                                         |
| <i>ost1-3</i>   | SALK_008068<br>for  | CCTCTGATGTCTTGGTGTCG      |                                         |
|                 | SALK_008068<br>rev  | TGGAAGAAAAACCTCGCCTA      |                                         |
|                 |                     |                           |                                         |
| <i>cyp707a1</i> | SALK_069127<br>for  | CATGAACGTATTGGGTTTTGG     |                                         |
|                 | SALK_069127<br>rev  | TCCTGATATTGAATCCATCGC     |                                         |
|                 |                     |                           |                                         |
| <i>cyp707a3</i> | SALK_078173C<br>for | GTTCTGGAAGATTAATCGGC      |                                         |
|                 | SALK_078173C<br>rev | ACGTGCTCTCGTCACTCTCTC     |                                         |
| SALK Lbb        |                     | GCGTGGACCGCTTGCTGCAACT    |                                         |

102

103 Plants for gas-exchange measurements were sown into 2:1 (v:v) peat:vermiculite  
 104 mixture and grown through a hole in a glass plate covering the pot as described in  
 105 Kollist et al. (2007). Plants were grown in growth chambers (AR-66LX, Percival  
 106 Scientific, IA, USA and Snijders Scientific, Drogenbos, Belgia) with 12 h photoperiod,

107 23/18 °C day/night temperature, 150  $\mu\text{mol m}^{-2} \text{s}^{-1}$  light and 70% relative humidity.  
108 Plants were 24-30 days old during gas-exchange experiments.

109 Stomatal conductance of intact plants was measured using a rapid-response gas-  
110 exchange measurement device similar to the one described by Kollist et al. (2007)  
111 consisting of eight thermostated flow-through whole-rosette cuvettes. Plants were  
112 inserted into the measurement chambers and after stomatal conductance had  
113 stabilized, the following stimuli were applied: reduction in air humidity (decrease from  
114 65-75% to 30-40%), darkness (decrease from 150  $\mu\text{mol m}^{-2} \text{s}^{-1}$  to 0 light),  $\text{CO}_2$   
115 (increase from 400 ppm to 800 ppm) and spraying plants with 0  $\mu\text{M}$ , 5  $\mu\text{M}$  or 50  $\mu\text{M}$   
116 ABA solution with 0.012% Silwet L-77 (Duchefa) and 0.05% ethanol. ABA-induced  
117 stomatal closure experiments were carried out as described previously (Merilo et al.,  
118 2018). Initial changes in stomatal conductance were calculated as  $gs_{18}-gs_0$ , where  
119  $gs_0$  is the pretreatment stomatal conductance and  $gs_{18}$  is the value of stomatal  
120 conductance 18 min after factor application; 16min in case of ABA spraying.

### 121 **Measurement of stomatal aperture and density**

122 Epidermal peels were stripped from four-week-old plants grown in growth chambers  
123 as described above and incubated in resting buffer (containing 10 mM MES-KOH  
124 pH6.2) for 2.5 hours. Images of stomata were taken with a Zeiss Axio Examiner.D1  
125 microscope. Images were taken of 15 stomata per leaf and averaged to characterize  
126 the stomatal aperture of each plant. Six plants per genotype were analyzed.  
127 Stomatal aperture width was measured using the image processing software ImageJ  
128 1.51k (National Institutes of Health, USA).

129 For stomatal density (SD) measurements, leaves of 5 weeks-old plants grown as  
130 described above, one leaf per plant, were excised and the abaxial side was covered  
131 with dental resin (Xantropen VL Plus, Heraeus Kulzer, Germany). The hardened  
132 resin impressions were covered with transparent nail varnish. The dried nail varnish  
133 imprints were attached to a microscope glass slide with a transparent tape and  
134 images were taken with a Zeiss SteREO Discovery.V20 stereomicroscope. 24 plants  
135 per genotype were analyzed. SD was determined from an image with an area of  
136  $\sim 0.12 \text{ mm}^2$ , taken from the middle of the leaf, close to the middle vein and calculated  
137 as:  $SD = \text{number of stomata/area of the image}$

138 **Statistical analysis**

139 One-way ANOVA was used to compare the effect of genotype on the values of  
140 stomatal conductance, aperture, density and initial change in stomatal conductance.  
141 Comparisons between individual means were done with Tukey or Tukey unequal N  
142 HSD *post hoc* tests as indicated in figure legends. Stomatal conductance values  
143 before and after application of ABA were compared by repeated measures ANOVA  
144 with Tukey *post hoc* test. All effects were considered significant at  $p < 0.05$ . Statistical  
145 analyses were performed with Statistica, version 7.1 (StatSoft Inc., Tulsa, OK, USA).

146 **Accession Numbers**

147 ABA3 - AT1G16540; OST1 - AT4G33950; CYP707A1 - AT4G19230; CYP707A3 -  
148 AT5G45340.

## 149 Results

150 We crossed *ost1-3* into an ABA biosynthesis mutant (*aba3-1*) and to *cyp707a1*  
151 *cyp707a3* (here abbreviated as *cyp707a1/a3*) that lacks two proteins involved in ABA  
152 catabolism. By doing so, we generated plants where strong ABA-insensitivity caused  
153 by impaired OST1 was combined with defective ABA biosynthesis or breakdown (Fig.  
154 1). Steady-state stomatal conductance and rapid stomatal responses to various  
155 closure-inducing stimuli were measured in intact plants with a custom-made gas-  
156 exchange device as described before (Kollist et al., 2007). Our results showed that the  
157 *aba3-1* mutant displayed higher stomatal conductance, whereas *cyp707a1/a3* had  
158 reduced stomatal conductance compared to Col-0 wild-type (Fig. 2A), as can be  
159 expected on the basis of the ABA concentrations in these plants (Okamoto et al., 2006;  
160 Merilo et al., 2018). The double mutant *ost1 aba3* had higher stomatal conductance  
161 than either parent (Fig. 2A) and the triple mutant *ost1 cyp707a1/a3* displayed lower  
162 stomatal conductance than the single *ost1-3* (Fig. 2A).

163 As altered stomatal conductance can result from a change in stomatal aperture width  
164 or in stomatal density, we next determined the stomatal apertures of the mutants.  
165 There were no differences in aperture widths between *cyp707a1/a3* and wild-type (Fig.  
166 2B). Compared to wild-type, stomata of *aba3-1* and *ost1-3* single mutants had  
167 significantly wider apertures (Fig. 2B). Aperture of *ost1 cyp707a1/a3* was similar to  
168 *ost1-3*, whereas *ost1 aba3* had significantly wider aperture compared to the single  
169 mutants (Fig. 2B). These results suggest that ABA-deficiency leads to wider stomatal  
170 apertures, whereas over-accumulation of ABA seems to have no effect on aperture  
171 width. However, *cyp707a1/a3* (compared to Col-0) and *ost1 cyp707a1/a3* (compared  
172 to *ost1*) showed differences in stomatal conductance but not in aperture widths,  
173 indicating that some other trait besides aperture is involved in determining stomatal  
174 conductance.

175 In order to test whether the differences in stomatal conductance in the studied mutants  
176 were associated with altered stomatal density, we measured stomatal density using  
177 leaf impressions. Consistent with already published results (Tanaka et al., 2013;  
178 Chater et al., 2015), *aba3-1* had higher and *cyp707a1/a3* lower stomatal density  
179 compared to wild-type in our experiment (Figs. 3A-B). The stomatal density of *ost1-3*  
180 was similar to wild-type, but through genetically altering the ABA concentration in the



181 *ost1-3* mutant, we could affect the stomatal development. Compared to the single  
182 *ost1-3* mutant, *ost1 aba3* and *ost1 cyp707a1/a3* had significantly higher or lower  
183 stomatal density, respectively (Figs. 3A-B). Taken together, stomatal conductance,  
184 aperture and density results show that *ost1-3* has higher stomatal conductance due to  
185 more open stomata (Figs. 2-3; Mustilli et al., 2002). However, ABA concentration is a  
186 crucial signal for stomatal development, which was apparently regulated by an OST1-  
187 independent mechanism.

188 To further characterize the role of ABA levels and OST1 in stomatal regulation, we  
189 tested the responses of single mutants, *ost1 aba3* and *ost1 cyp707a1/a3* to closure-  
190 inducing factors (Fig. 4 A-D). The closure induced by all stimuli was significantly  
191 impaired in *ost1-3*, whereas *aba3-1* plants showed wild-type-like closure or, in the  
192 case of reduced air humidity and ABA, even a hypersensitive response. In response  
193 to darkness, reduced air humidity and elevated CO<sub>2</sub>, the behavior of *ost1 aba3* and  
194 *ost1 cyp707a1/a3* mutants was not significantly different from *ost1-3* single mutant  
195 (Fig. 4 A-D, E-H). In response to ABA, *ost1 aba3* plants regained a small response  
196 that was larger compared to *ost1-3*, but reduced compared to wild-type (Fig. 4 D, H).  
197 Nevertheless, *ost1 aba3* and *ost1 cyp707a1/a3* were clearly impaired in rapid stomatal  
198 responses, supporting the critical role of OST1 in the regulation of stomatal aperture  
199 to sudden changes in the environment.

200

## 201 Discussion

202 Understanding stomatal function is critical for breeding plants with improved properties  
203 in water limiting conditions. As increased water loss from plants could be the result of  
204 either more open stomata or an increased number of stomata, the regulatory interplay  
205 between these traits is an important issue to be resolved. Changes in stomatal  
206 aperture width and density resulted in altered stomatal conductance, as suggested by  
207 our results (Fig. 2, Fig. 3 A). Through genetic manipulation of ABA levels,  
208 measurements of stomatal conductance, aperture, density and responses to various  
209 treatments, we propose that the overall water flux through stomata is the sum of two  
210 signaling pathways: an ABA-dependent pathway that is OST1-independent and  
211 regulates stomatal density; and an OST1-dependent pathway that regulates rapid  
212 changes of stomatal aperture. This conclusion is supported by our results which show  
213 significant differences in stomatal conductance due to differences in stomatal density  
214 and aperture between the single *ost1-3* mutant and its double and triple mutants where  
215 ABA levels are genetically reduced (*ost1 aba3*) and increased (*ost1 cyp707a1/a3*),  
216 respectively, while responses to various environmental stimuli are impaired in these  
217 mutants. It remains to be clarified whether other SnRKs besides OST1 (SnRK2.6) are  
218 involved in the ABA-dependent signaling involved in stomatal development.  
219 Alternatively, stomatal density could be determined by a SnRK-independent  
220 mechanism. However, the recent findings that a mutant lacking six ABA receptors and  
221 the PP2C mutants *abi1-1* and *abi2-1* also showed higher stomatal densities (Tanaka  
222 et al., 2013; Merilo et al., 2018) indicate that the canonical ABA signaling pathway  
223 starting with ABA receptors (Fig. 1) is involved in the regulation of stomatal  
224 development.

225 The change in stomatal conductance of mutants with altered concentrations of ABA  
226 appears to result from a change in stomatal density (Fig. 3A), aperture width or both,  
227 as in *aba3-1* (Fig. 2). The *aba3-1* mutant is relatively mildly impaired in ABA  
228 biosynthesis and still contains approximately 45% of wildtype ABA levels (Merilo et al.,  
229 2018). Mutants with more severely impaired ABA biosynthesis including *aba2-11* or  
230 *nced3 nced5* have considerably higher stomatal conductance than *aba3-1* (Merilo et  
231 al., 2018). Thus, the influence of ABA on stomatal aperture or density might become  
232 more prominent in plant lines where ABA concentrations are more severely reduced.  
233 By using stronger ABA-deficient lines including *aba2-11* or *nced3 nced5* (Merilo et al.,

234 2018) or growing plants in water deficit conditions and measuring aperture and density  
235 may help to understand the balance between stomatal density and aperture in  
236 determining water flux through plants i.e. stomatal conductance. Stomatal density  
237 appeared to be more sensitive to reduced ABA levels than to increased levels as  
238 *cyp707a1/a3* showed only reduced density compared to wildtype (Fig. 2B). In order to  
239 breed crops for future climate, we need to understand the contribution of both stomatal  
240 density and stomatal aperture to plant water relations (see also Hughes et al., 2017).  
241 The latter is subjected to a rapid and up-to-date environmental control, whereas the  
242 former is fixed during plant development.

243 The triple mutant *snrk2.2 snrk2.3 snrk2.6* is completely impaired in ABA responses,  
244 including seed germination and gene expression (Fujii and Zhu, 2009; Umezawa et  
245 al., 2009). Thus, the OST1-independent mechanism regulating stomatal density could  
246 be genetically redundant among this group of SnRKs. Unfortunately the severe  
247 developmental defects of the *snrk* triple mutant (Fujii and Zhu, 2009) make it difficult  
248 to directly test this hypothesis. The *ost1* mutant was previously shown to completely  
249 lack stomatal responses to ABA (Mustilli et al., 2002), and applied at 5  $\mu$ M, the *ost1*  
250 mutant is unresponsive to ABA (Fig. 4D). In an attempt to clarify if there is genetic  
251 redundancy among the SnRKs also in stomatal function, we treated *ost1-3* plants with  
252 very high 50  $\mu$ M ABA, which induced a partial stomatal closure (Fig. S1). This supports  
253 earlier findings indicating that, besides OST1 there are other components, including  
254 SNRK2.2 and SNRK2.3 and other possible kinases, such as calcium dependent  
255 protein kinases (Brandt et al., 2015) or GHR1 (GUARD CELL HYDROGEN  
256 PEROXIDE\_RESISTANT1) (Hua et al., 2012) acting in the ABA signaling pathway,  
257 that might contribute to ABA-induced stomatal closure. Other kinases may also explain  
258 the increased aperture width of *ost1 aba3* double mutant compared to single mutants.  
259 Several mitogen-activated protein kinases (MAPK) are involved in stomatal  
260 development (Wang et al., 2007) and ABA signaling (Jammes et al., 2009), indicating  
261 that MPKs might also contribute in the regulation of stomatal development and  
262 aperture in an ABA-dependent manner. Therefore, there are several candidate  
263 kinases in addition to OST1 in regulating stomatal responses to ABA.

264 Our results presented here show that it is possible to separate ABA signaling pathways  
265 that regulate stomatal aperture versus stomatal development. This information can be  
266 useful to breed separately for these traits to obtain plants suited for either rapidly

267 changing environmental conditions or for conditions characterized by long-term  
268 drought.

269 **Acknowledgments**

270 No conflict of interest declared.

271 This work was supported by the Estonian Ministry of Science and Education (IUT2-21  
272 to H.K. and PUT-1133 to E.M.), the European Regional Development Fund (Center of  
273 Excellence in Molecular Cell Engineering CEMCE to H.K.), the Academy of Finland  
274 (grant number #307335, Center of Excellence in Molecular Biology of Primary  
275 Producers 2014-2019 to M.B.)

276

277 **References**

- 278 Brandt, B., Munemasa, S., Wang, C., Nguyen, D., Yong, T., Yang, P. G., Poretsky,  
279 E., Belknap, T. F., Waadt, R., Aleman, F., et al. (2015). Calcium specificity  
280 signaling mechanisms in abscisic acid signal transduction in Arabidopsis  
281 guard cells. *eLife* 4.
- 282 Casson, S. A., and Hetherington, A. M. (2010). Environmental regulation of stomatal  
283 development. *Curr. Opin. Plant Biol.* 13:90–95.
- 284 Casson, S. A., Franklin, K. A., Gray, J. E., Grierson, C. S., Whitlam, G. C., and  
285 Hetherington, A. M. (2009). phytochrome B and PIF4 regulate stomatal  
286 development in response to light quantity. *Curr. Biol. CB* 19:229–234.
- 287 Chater, C., Peng, K., Movahedi, M., Dunn, J. A., Walker, H. J., Liang, Y.-K.,  
288 McLachlan, D. H., Casson, S., Isner, J. C., Wilson, I., et al. (2015). Elevated  
289 CO<sub>2</sub>-Induced Responses in Stomata Require ABA and ABA Signaling. *Curr.*  
290 *Biol.* 25:2709–2716.
- 291 Fujii, H., and Zhu, J.-K. (2009). Arabidopsis mutant deficient in 3 abscisic acid-  
292 activated protein kinases reveals critical roles in growth, reproduction, and  
293 stress. *Proc. Natl. Acad. Sci.* 106:8380.
- 294 Hetherington, A. M., and Woodward, F. I. (2003). The role of stomata in sensing and  
295 driving environmental change. *Nature* 424:901–908.
- 296 Hua, D., Wang, C., He, J., Liao, H., Duan, Y., Zhu, Z., Guo, Y., Chen, Z., and Gong,  
297 Z. (2012). A plasma membrane receptor kinase, GHR1, mediates abscisic  
298 acid- and hydrogen peroxide-regulated stomatal movement in Arabidopsis.  
299 *Plant Cell* 24:2546–2561.
- 300 Hughes, J., Hepworth, C., Dutton, C., Dunn, J. A., Hunt, L., Stephens, J., Waugh, R.,  
301 Cameron, D. D., and Gray, J. E. (2017). Reducing Stomatal Density in Barley  
302 Improves Drought Tolerance without Impacting on Yield. *Plant Physiol.*  
303 174:776.
- 304 Jammes, F., Song, C., Shin, D., Munemasa, S., Takeda, K., Gu, D., Cho, D., Lee, S.,  
305 Giordo, R., Sritubtim, S., et al. (2009). MAP kinases MPK9 and MPK12 are  
306 preferentially expressed in guard cells and positively regulate ROS-mediated  
307 ABA signaling. *Proc. Natl. Acad. Sci. U. S. A.* 106:20520–20525.
- 308 Kim, T.-H., Böhmer, M., Hu, H., Nishimura, N., and Schroeder, J. I. (2010). Guard  
309 Cell Signal Transduction Network: Advances in Understanding Abscisic Acid,  
310 CO<sub>2</sub>, and Ca<sup>2+</sup> Signaling. *Annu. Rev. Plant Biol.* 61:561–591.
- 311 Kollist, T., Moldau, H., Rasulov, B., Oja, V., Rämme, H., Hüve, K., Jaspers, P.,  
312 Kangasjärvi, J., and Kollist, H. (2007). A novel device detects a rapid ozone-  
313 induced transient stomatal closure in intact Arabidopsis and its absence in  
314 *abi2* mutant. *Physiol. Plant.* 129:796–803.
- 315 Kollist, H., Nuhkat, M., and Roelfsema, M. R. G. (2014). Closing gaps: linking  
316 elements that control stomatal movement. *New Phytol.* 203:44–62.

- 317 Merilo, E., Laanemets, K., Hu, H., Xue, S., Jakobson, L., Tulva, I., Gonzalez-  
318 Guzman, M., Rodriguez, P. L., Schroeder, J. I., Broschè, M., et al. (2013).  
319 PYR/RCAR Receptors Contribute to Ozone-, Reduced Air Humidity-,  
320 Darkness-, and CO<sub>2</sub>-Induced Stomatal Regulation. *Plant Physiol.* 162:1652–  
321 1668.
- 322 Merilo, E., Jalakas, P., Laanemets, K., Mohammadi, O., Horak, H., Kollist, H., and  
323 Brosche, M. (2015). Abscisic Acid Transport and Homeostasis in the Context  
324 of Stomatal Regulation. *Mol. Plant* 8:1321–1333.
- 325 Merilo, E., Yarmolinsky, D., Jalakas, P., Parik, H., Tulva, I., Rasulov, B., Kilk, K., and  
326 Kollist, H. (2018). Stomatal VPD Response: There Is More to the Story Than  
327 ABA. *Plant Physiol.* 176:851–864.
- 328 Mustilli, A.-C., Merlot, S., Vavasseur, A., Fenzi, F., and Giraudat, J. (2002).  
329 Arabidopsis OST1 Protein Kinase Mediates the Regulation of Stomatal  
330 Aperture by Abscisic Acid and Acts Upstream of Reactive Oxygen Species  
331 Production. *Plant Cell* 14:3089–3099.
- 332 Nambara, E., and Marion-Poll, A. (2005). Abscisic acid biosynthesis and catabolism.  
333 *Annu. Rev. Plant Biol.* 56:165–185.
- 334 Okamoto, M., Kuwahara, A., Seo, M., Kushiro, T., Asami, T., Hirai, N., Kamiya, Y.,  
335 Koshiba, T., and Nambara, E. (2006). CYP707A1 and CYP707A2, Which  
336 Encode Abscisic Acid 8'-Hydroxylases, Are Indispensable for Proper Control  
337 of Seed Dormancy and Germination in Arabidopsis. *Plant Physiol.* 141:97–  
338 107.
- 339 Saito, S., Hirai, N., Matsumoto, C., Ohigashi, H., Ohta, D., Sakata, K., and Mizutani,  
340 M. (2004). Arabidopsis CYP707As Encode (+)-Abscisic Acid 8'-Hydroxylase,  
341 a Key Enzyme in the Oxidative Catabolism of Abscisic Acid. *Plant Physiol.*  
342 134:1439–1449.
- 343 Tanaka, Y., Nose, T., Jikumaru, Y., and Kamiya, Y. (2013). ABA inhibits entry into  
344 stomatal-lineage development in Arabidopsis leaves. *Plant J.* 74:448–457.
- 345 Umezawa, T., Sugiyama, N., Mizoguchi, M., Hayashi, S., Myouga, F., Yamaguchi-  
346 Shinozaki, K., Ishihama, Y., Hirayama, T., and Shinozaki, K. (2009). Type 2C  
347 protein phosphatases directly regulate abscisic acid-activated protein kinases  
348 in Arabidopsis. *Proc. Natl. Acad. Sci.* 106:17588.
- 349 Vlad, F., Rubio, S., Rodrigues, A., Sirichandra, C., Belin, C., Robert, N., Leung, J.,  
350 Rodriguez, P. L., Lauriere, C., and Merlot, S. (2009). Protein phosphatases  
351 2C regulate the activation of the Snf1-related kinase OST1 by abscisic acid in  
352 Arabidopsis. *Plant Cell* 21:3170–3184.
- 353 Wang, H., Ngwenyama, N., Liu, Y., Walker, J. C., and Zhang, S. (2007). Stomatal  
354 development and patterning are regulated by environmentally responsive  
355 mitogen-activated protein kinases in Arabidopsis. *Plant Cell* 19:63–73.
- 356 Woodward, F. I., and Kelly, C. K. (1995). The influence of CO<sub>2</sub> concentration on  
357 stomatal density. *New Phytol.* 131:311–327.

- 358 Woodward, F. I., Lake, J. A., and Quick, W. P. (2002). Stomatal development and  
359 CO<sub>2</sub>: ecological consequences. *New Phytol.* 153:477–484.
- 360 Xiong, L., Ishitani, M., Lee, H., and Zhu, J.-K. (2001). The Arabidopsis LOS5/ABA3  
361 Locus Encodes a Molybdenum Cofactor Sulfurase and Modulates Cold  
362 Stress– and Osmotic Stress–Responsive Gene Expression. *Plant Cell*  
363 13:2063–2084.
- 364



365 **Figure legends**

366 **Figure 1.** Schematic overview of ABA concentration determined by ABA biosynthesis  
367 and catabolism, followed by the core components in ABA signalling leading to stomatal  
368 closure. Mutants used in this study are indicated in grey background. New double and  
369 triple mutants generated for this study are *ost1 aba3* and *ost1 cyp707a1/a3*.

370 **Figure 2.** (A) Whole-plant steady-state stomatal conductance (gs) of three- to four-  
371 week-old plants. The ABA biosynthesis mutant *aba3-1* and catabolism double mutant  
372 *cyp707a1/a3* were crossed to *ost1-3* to genetically reduce or increase the ABA  
373 concentration in *ost1-3* background. Letters denote statistically significant differences  
374 between lines (ANOVA with Tukey unequal N HSD *post hoc* test,  $p < 0.05$ ;  $n=8-13$ ).

375 (B) Stomatal aperture measured on epidermal peels of four-week-old plants. Letters  
376 denote statistically significant differences between lines (ANOVA with Tukey *post hoc*  
377 test,  $p < 0.05$ ;  $n=6$ ).

378 **Figure 3.** (A) Stomatal density of five-week-old plants. Letters denote statistically  
379 significant differences between lines (ANOVA with Tukey *post hoc* test,  $p < 0.05$ ;  
380  $n=24$ ).

381 (B) Tracing of epidermal impressions to illustrate the differences in stomatal densities  
382 between lines. The scale bar represents 50  $\mu\text{m}$ .

383 **Figure 4.** (A-D) Time courses of stomatal conductances in response to reduced air  
384 humidity (A), darkness (B), elevated  $\text{CO}_2$  (C) and ABA treatment (D). (E-H) Changes  
385 in stomatal conductance during the first 18 minutes (first 16 min in the ABA treatment).  
386 Letters denote statistically significant differences between lines (ANOVA with Tukey  
387 unequal N HSD *post hoc* test,  $p < 0.05$ ;  $n=8-15$ ).

388 **Figure S1.** Stomatal response of Col-0 and *ost1-3* mutant to foliar ABA spraying (0  
389  $\mu\text{M}$ , 5  $\mu\text{M}$  and 50  $\mu\text{M}$ ). Average ( $\pm$  SE,  $n=9$ ) stomatal conductance before and 56 min  
390 after treatment with ABA. Statistically significant differences between post- and  
391 pretreatment stomatal conductance values are denoted by \* (Repeated measures  
392 ANOVA with Tukey *post hoc* test,  $p < 0.05$ ).

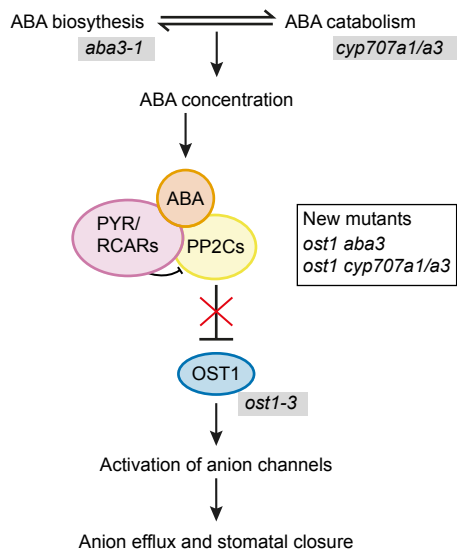

**Figure 1.** Schematic overview of ABA concentration determined by ABA biosynthesis and catabolism, followed by the core components in ABA signalling leading to stomatal closure. Mutants used in this study are indicated in grey background. New double and triple mutants generated for this study are *ost1 aba3* and *ost1 cyp707a1/a3*.

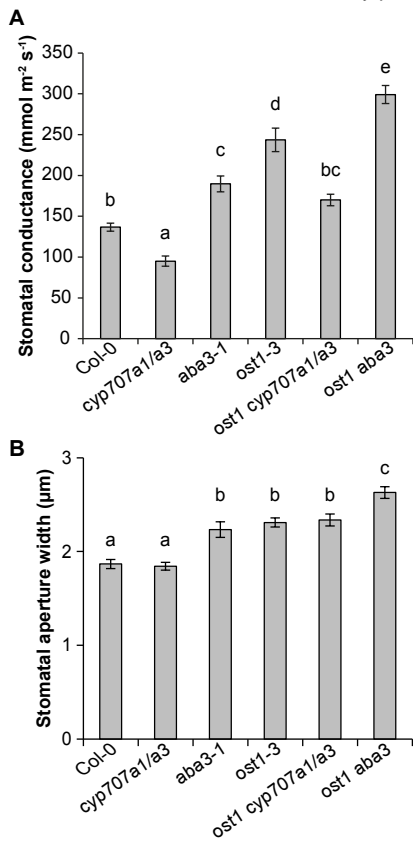

**Figure 2.** (A) Whole-plant steady-state stomatal conductance (gs) of three- to four-week-old plants. The ABA biosynthesis mutant *aba3-1* and catabolism double mutant *cyp707a1/a3* were crossed to *ost1-3* to genetically reduce or increase the ABA concentration in *ost1-3* background. Letters denote statistically significant differences between lines (ANOVA with Tukey unequal N HSD *post hoc* test,  $p < 0.05$ ;  $n=8-13$ ).

(B) Stomatal aperture measured on epidermal peels of four-week-old plants. Letters denote statistically significant differences between lines (ANOVA with Tukey *post hoc* test,  $p < 0.05$ ;  $n=6$ ).

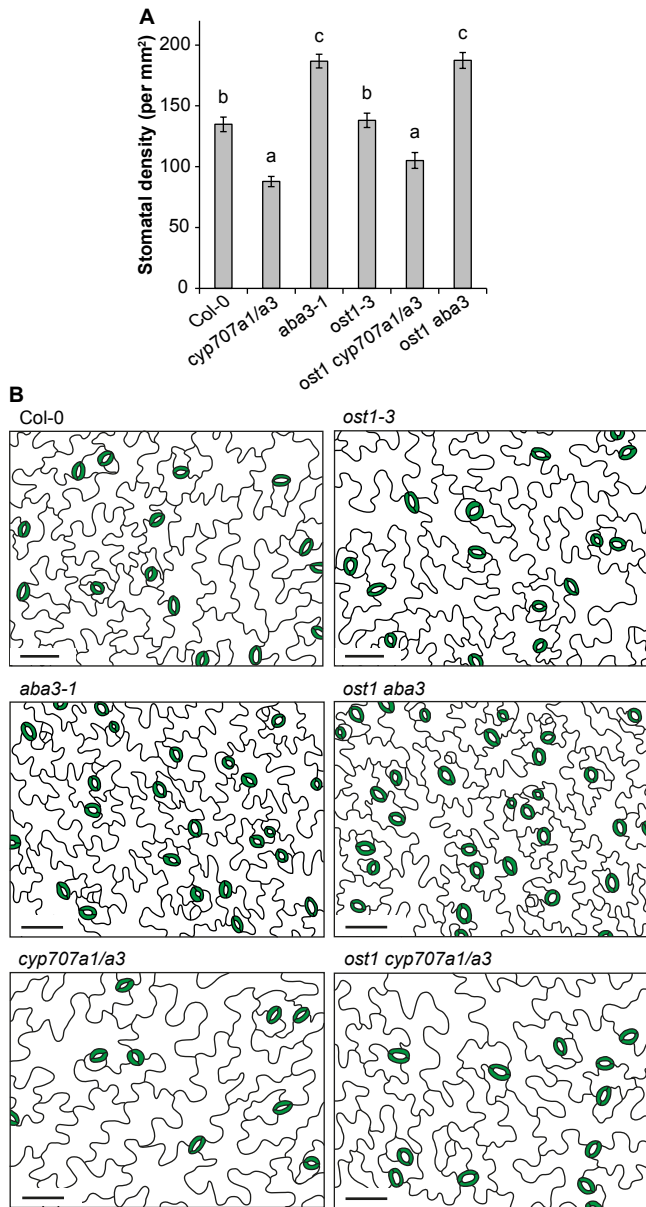

**Figure 3.** (A) Stomatal density of five-week-old plants. Letters denote statistically significant differences between lines (ANOVA with Tukey *post hoc* test,  $p < 0.05$ ;  $n=24$ ).

(B) Tracing of epidermal impressions to illustrate the differences in stomatal densities between lines. The scale bar represents 50  $\mu\text{m}$ .

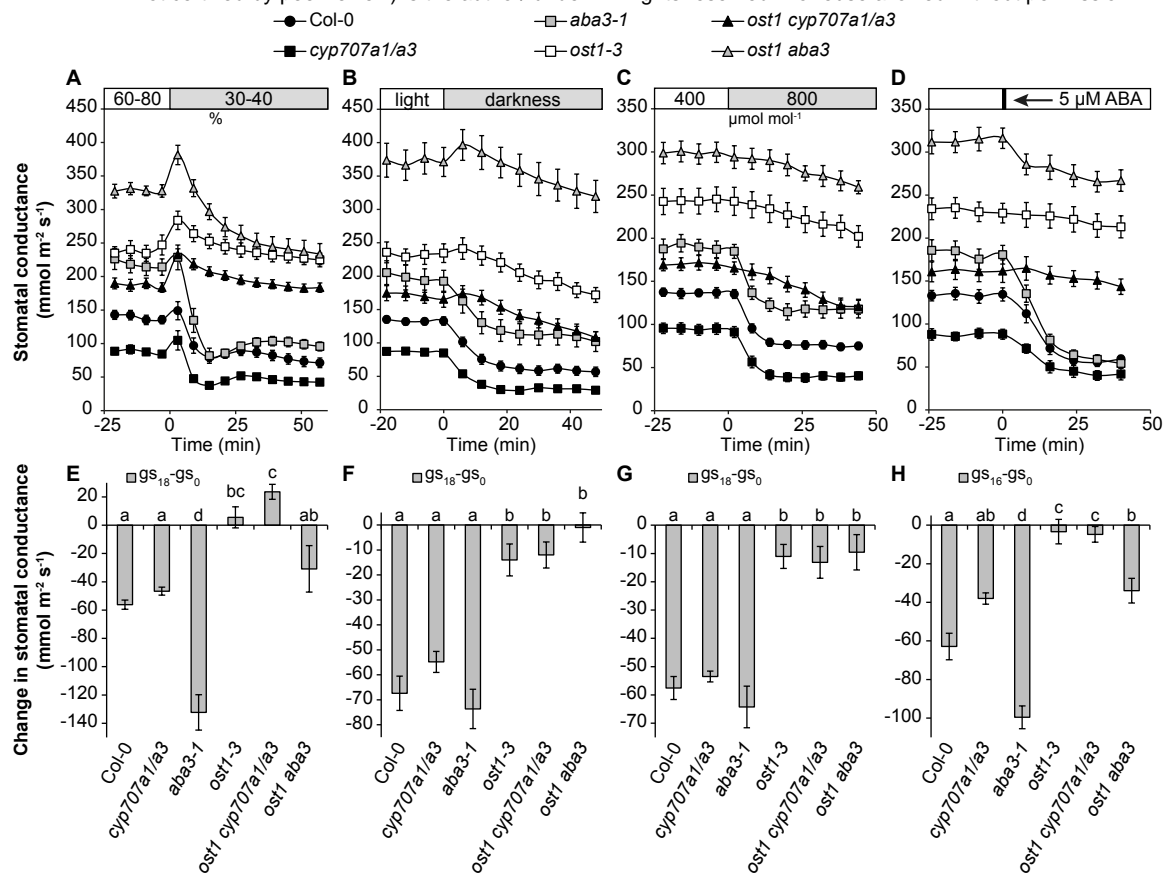

**Figure 4.** (A-D) Time courses of stomatal conductances in response to reduced air humidity (A), darkness (B), elevated CO<sub>2</sub> (C) and ABA treatment (D). (E-H) Changes in stomatal conductance during the first 18 minutes (first 16 min in the ABA treatment). Letters denote statistically significant differences between lines (ANOVA with Tukey unequal N HSD *post hoc* test,  $p < 0.05$ ;  $n=8-15$ ).

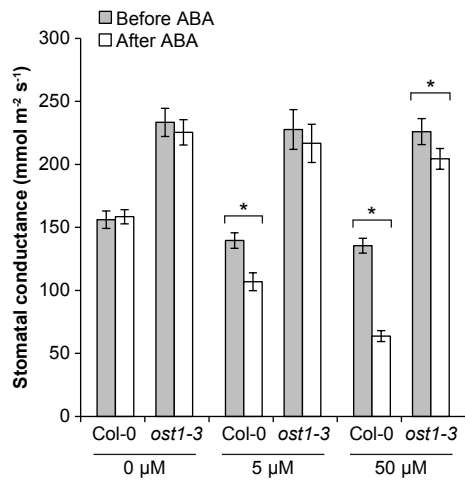

**Figure S1.** Stomatal response of Col-0 and *ost1-3* mutant to foliar ABA spraying (0 μM, 5 μM and 50 μM). Average ( $\pm$  SE, n=9) stomatal conductance before and 56 min after treatment with ABA. Statistically significant differences between post- and pretreatment stomatal conductance values are denoted by \* (Repeated measures ANOVA with Tukey post hoc test,  $p < 0.05$ ).
